# Supplementary material for: Predictive Utility of Changes in Optic Nerve Sheath Diameter after Cardiac Arrest for Neurologic Outcomes
Source: Preprints.org preprint supplement (doi:10.20944/preprints202105.0167.v1), 2021-05-10
Supplement: Supplementary file 1 [file SuppleTable1.docx]

Supplemental table 1. Comparison of the optic nerve sheath diameter between pre-cardiac arrest and post-cardiac arrest in good neurologic outcome and poor neurologic outcome group.

|  | GNO (n = 25) | | | PNO (n=71) | | |
| --- | --- | --- | --- | --- | --- | --- |
| Pre-CA | Post-CA | *p*-value | Pre-CA | Post-CA | *p*-value |
| Right eye, mm | 5.04 (4.76-5.62) | 5.39 (5.13-5.96) | 0.001 | 5.22 (4.65-5.51) | 5.79 (5.53-6.19) | <0.001 |
| Left eye, mm | 5.09 (4.76-5.68) | 5.57 (5.10-5.88) | <0.001 | 5.05 (4.73-5.39) | 5.70 (5.40-5.99) | <0.001 |
| Average*, mm | 5.06 (4.71-5.60) | 5.50 (5.16-5.91) | <0.001 | 5.07 (4.73-5.52) | 5.72 (5.49-6.04) | 0.001 |
| Abbreviations: GNO, good neurologic outcome; PNO, poor neurologic outcome; CA, cardiac arrest  *Average optic nerve sheath diameter of right and left eyes | | | | | | |
